# Supplementary material
Source: PubMed Central journal article supplement (PMC1559835)
Supplement: rspb20053123s04.pdf [file rspb20053123s04.pdf]

# ELECTRONIC APPENDIX

This is the Electronic Appendix to the article

**Relatedness and helping in fish: examining the theoretical predictions**

by

Kelly Stiver, Petra Dierkes, Michael Taborsky, H. Lisle Gibbs and Sigal Balshine

*Proc. R. Soc. B* ([doi:10.1098/rspb.2005.3123](https://doi.org/10.1098/rspb.2005.3123))

Electronic appendices are refereed with the text; however, no attempt is made to impose a uniform editorial style on the electronic appendices.

## Relatedness and helping

**Appendix 1.** Helping effort and relatedness using all the available helper-breeder genetic dyad values and all recorded helper behavioural data. Here, some groups are represented by several helpers hence some breeders have contributed repeatedly to the helper–breeder relatedness scores.

| variables                                   |                                                          | number of fish                                         | test statistic                                   | <i>P</i> |
|---------------------------------------------|----------------------------------------------------------|--------------------------------------------------------|--------------------------------------------------|----------|
| helper relatedness to breeding male         | vs. helper relatedness to breeding female                | <i>N</i> = 70                                          | <i>t</i> = -2.8                                  | 0.006    |
| helper relatedness to breeding male         | vs. simulation average <i>r</i> = 0.5 ( <i>N</i> = 1000) | <i>N</i> = 101                                         | <i>t</i> = -19.5                                 | < 0.0001 |
| helper relatedness to breeding female       | vs. simulation average <i>r</i> = 0.5 ( <i>N</i> = 1000) | <i>N</i> = 110                                         | <i>t</i> = -18.3                                 | < 0.0001 |
| average helper relatedness to both breeders | vs. total helping effort                                 | <i>N</i> = 32                                          | <i>Rho</i> = 0.021                               | 0.91     |
| helper relatedness to breeding male         | vs. territory defense                                    | <i>N</i> = 39                                          | <i>Rho</i> = -0.34                               | 0.03     |
| helper relatedness to breeding female       | vs. territory defense                                    | <i>N</i> = 48                                          | <i>Rho</i> = 0.23                                | 0.12     |
| helper relatedness to breeding male         | vs. territory defense                                    | <i>N<sub>R</sub></i> = 14<br><i>N<sub>U</sub></i> = 25 | <i>U</i> = 98.5                                  | 0.04     |
| helper relatedness to breeding female       | vs. territory defense                                    | <i>N<sub>R</sub></i> = 24<br><i>N<sub>U</sub></i> = 24 | <i>U</i> = 189.5                                 | 0.04     |
| helper relatedness to breeding female       | vs. helper relatedness to breeding male                  | <i>N</i> = 70                                          | <i>R</i> <sup>2</sup> = 0.046<br><i>Z</i> = 1.78 | 0.07     |
